# Supplementary material for: Inhibition of Connexin 43 reverses ox-LDL-mediated inhibition of autophagy in VSMC by inhibiting the PI3K/Akt/mTOR signaling pathway
Source: PeerJ. 2022 Mar 16;10:e12969. doi: 10.7717/peerj.12969 (PMC8934045; doi:10.7717/peerj.12969)
Supplement: Supplemental Information 2 — Mean, SD and confidence interval. [file peerj-10-12969-s002.xlsx]

## Sheet: Fig 1
FIG 1
p62(Fig1B)	0	3	6	12	24	48
mean	0.198026	0.235573	0.266857	0.299416	0.344552	0.311152
SD	0.0333294	0.0290205	0.0473919	0.0457256	0.0323501	0.0151515
95% confidence interval(0 vs. 3)	-0.04921 to 0.1243
95% confidence interval( 0 vs. 6)	-0.04492 to 0.1826
95% confidence interval( 0 vs. 12)	-0.009697 to 0.2125
95% confidence interval( 0 vs. 24)	0.05534 to 0.2377
95% confidence interval( 0 vs. 48)	0.04125 to 0.185
Beclin 1(Fig1C)	0	3	6	12	24	48
mean	1.08663	0.981244	0.765566	0.592664	0.52838	0.394451
SD	0.0769843	0.0542652	0.0847851	0.0687258	0.0651677	0.111053
95% confidence interval(0 vs. 3)	-0.2903 to 0.07952
95% confidence interval( 0 vs. 6)	-0.5459 to -0.09623
95% confidence interval( 0 vs. 12)	-0.6966 to -0.2914
95% confidence interval( 0 vs. 24)	-0.7563 to -0.3602
95% confidence interval( 0 vs. 48)	-0.9575 to -0.4269
LC3(Fig1D)	0	3	6	12	24	48
mean	0.356493	0.33785	0.290476	0.271999	0.229459	0.125303
SD	0.0346537	0.0454703	0.0194014	0.0344121	0.0458565	0.0327408
95% confidence interval(0 vs. 3)	-0.1309 to 0.0936
95% confidence interval( 0 vs. 6)	-0.144 to 0.01195
95% confidence interval( 0 vs. 12)	-0.1804 to 0.01139
95% confidence interval( 0 vs. 24)	-0.2399 to -0.01419
95% confidence interval( 0 vs. 48)
p62(Fig1F)	0	20	40	80	160
mean	0.207852	0.264132	0.336105	0.383205	0.439565
SD	0.0513071	0.0503272	0.0495223	0.0541417	0.0454584
95% confidence interval(0 vs. 20)	-0.08482 to 0.1974
95% confidence interval( 0 vs. 40)	-0.01174 to 0.2682
95% confidence interval( 0 vs. 80)	0.02891 to 0.3218
95% confidence interval( 0 vs. 160)	0.09714 to 0.3663
Beclin 1(Fig1G)	0	20	40	80	160
mean	1.88973	1.6198	1.24323	0.780711	0.586163
SD	0.0839383	0.0703197	0.066351	0.0478805	0.162994
95% confidence interval(0 vs. 20)	-0.4849 to -0.05495
95% confidence interval( 0 vs. 40)	-0.8566 to -0.4364
95% confidence interval( 0 vs. 80)	-1.299 to -0.9193
95% confidence interval( 0 vs. 160)	-1.664 to -0.9436
LC3(Fig1H)	0	20	40	80	160
mean	0.706808	0.567786	0.447951	0.376178	0.348482
SD	0.0587651	0.0454733	0.0274227	0.0304217	0.0350725
95% confidence interval(0 vs. 20)	-0.2849 to 0.006856
95% confidence interval( 0 vs. 40)	-0.3862 to -0.1315
95% confidence interval( 0 vs. 80)	-0.4605 to -0.2007
95% confidence interval( 0 vs. 160)	-0.4927 to -0.224

## Sheet: Fig 2
FIG 2
Cx43(Fig2B)	Control	ox-LDL
mean	0.439963	0.671117
SD	0.0349098	0.0703666
95% confidence interval(Control vs. ox-LDL)	0.07694 to 0.3854

## Sheet: Fig 3
FIG 3
p62(Fig3B)	Control	ox-LDL	ox-LDL+Gap26	Gap26
mean	0.831964	1.38047	0.935781	0.85735
SD	0.111201	0.126172	0.0659638	0.0803417
95% confidence interval(Control vs. ox-LDL)	0.2183 to 0.8787
95% confidence interval( ox-LDL vs. ox-LDL+Gap26)	-0.7242 to -0.1652
95% confidence interval(Control vs. Gap26)	-0.2439 to 0.2947
Beclin 1(Fig3C)	Control	ox-LDL	ox-LDL+Gap26	Gap26
mean	1.31291	0.724304	1.09839	1.20569
SD	0.158163	0.0628355	0.125108	0.127877
95% confidence interval(Control vs. ox-LDL)	-0.9227 to -0.2545
95% confidence interval( ox-LDL vs. ox-LDL+Gap26)	0.01154 to 0.1145
95% confidence interval(Control vs. Gap26)	-0.03308 to 0.009255
LC3(Fig3D)	Control	ox-LDL	ox-LDL+Gap26	Gap26
mean	0.258108	0.164304	0.227312	0.246197
SD	0.00702586	0.0216933	0.014718	0.00817733
95% confidence interval(Control vs. ox-LDL)	-0.1386 to -0.04904
95% confidence interval( ox-LDL vs. ox-LDL+Gap26)	0.01154 to 0.1145
95% confidence interval(Control vs. Gap26)	-0.03308 to 0.009255

## Sheet: Fig 4
FIG 4
p62(Fig4B)	Control	ox-LDL	ox-LDL+LY294002
mean	0.831964	1.38047	0.935781
SD	0.111201	0.126172	0.0659638
95% confidence interval(Control vs. ox-LDL)	0.09283 to 0.3581
95% confidence interval( ox-LDL vs. ox-LDL+LY294002)	-0.3565 to -0.05635
LC3(Fig4C)	Control	ox-LDL	ox-LDL+LY294002
mean	0.970617	0.669986	0.911065
SD	0.078293	0.0708304	0.0564843
95% confidence interval(Control vs. ox-LDL)	-0.5079 to -0.09336
95% confidence interval( ox-LDL vs. ox-LDL+LY294002)	0.06322 to 0.4189
Beclin 1(Fig4D)	Control	ox-LDL	ox-LDL+LY294002
mean	1.04091	0.779641	0.979165
SD	0.0368053	0.0654291	0.0420065
95% confidence interval(Control vs. ox-LDL)	-0.4087 to -0.1139
95% confidence interval( ox-LDL vs. ox-LDL+LY294002)	0.04688 to 0.3522
p-PI3K/PI3K(Fig4F)	Control	ox-LDL	ox-LDL+Gap26	Gap26
mean	0.484797	0.705167	0.495465	0.468213
SD	0.0461629	0.0360652	0.038313	0.0504408
95% confidence interval(Control vs. ox-LDL)	0.1528 to 0.2879
95% confidence interval( ox-LDL vs. ox-LDL+Gap26)	-0.2704 to -0.149
95% confidence interval(Control vs. Gap26)	-0.09542 to 0.06225
p-AKT/AKT(Fig4G)	Control	ox-LDL	ox-LDL+Gap26	Gap26
mean	0.721178	1.28729	0.724001	0.788854
SD	0.128003	0.143813	0.0487458	0.0623595
95% confidence interval(Control vs. ox-LDL)	0.1881 to 0.9441
95% confidence interval( ox-LDL vs. ox-LDL+Gap26)	-0.8614 to -0.2652
95% confidence interval(Control vs. Gap26)	-0.2119 to 0.3472
p-mTOR/mTOR(Fig4H)	Control	ox-LDL	ox-LDL+Gap26	Gap26
mean	0.757735	1.42305	0.781825	0.578738
SD	0.115922	0.14628	0.0899487	0.0581696
95% confidence interval(Control vs. ox-LDL)	0.2989 to 1.032
95% confidence interval( ox-LDL vs. ox-LDL+Gap26)	-0.9784 to -0.3041
95% confidence interval(Control vs. Gap26)	-0.5429 to 0.1849
Cx43(Fig4J)	Control	ox-LDL	ox-LDL+LY294002
mean	0.758932	1.09403	0.820469
SD	0.0732489	0.101346	0.0248205
95% confidence interval(Control vs. ox-LDL)	0.0896 to 0.5806
95% confidence interval( ox-LDL vs. ox-LDL+LY294002)	-0.4784 to -0.06872

## Sheet: Supplementary Fig. 1
Supplementary Fig. 1
α-SMA	p3	p6
mean	1.04115	0.974804
SD	0.0641623	0.0372506
95% confidence interval(p3 vs. p6)	-0.212 to 0.07931
Desmin	p3	p6
mean	0.296558	0.289157
SD	0.02236	0.0159574
95% confidence interval(p3 vs. p6)	-0.06133 to 0.04653
